# Supplementary material for: Assessing and mapping language, attention and executive multidimensional deficits in stroke aphasia
Source: PubMed Central journal article supplement (PMC6794940; doi:10.1093/brain/awz258), 2019-09-05
Supplement: awz258_supplementary_data.pdf [file awz258_supplementary_data.pdf]

**Assessing and mapping language, attention and executive multidimensional  
deficits in stroke aphasia**

Rahel Schumacher, Ajay D. Halai, Matthew A. Lambon Ralph

**SUPPLEMENTARY MATERIAL**

## Contents

|                            |    |
|----------------------------|----|
| Abbreviations .....        | 3  |
| Supplementary Table 1..... | 4  |
| Supplementary Table 2..... | 5  |
| Supplementary Table 3..... | 6  |
| Supplementary Fig. 1 ..... | 7  |
| Supplementary Fig. 2 ..... | 9  |
| Supplementary Fig. 3 ..... | 11 |
| Supplementary Fig. 4 ..... | 12 |
| Supplementary Fig. 5 ..... | 14 |
| References .....           | 16 |

## **Abbreviations**

BDAE = Boston Diagnostic Aphasia Examination

CCT = Camel & Cactus Test

MLU = Mean length of utterance

NW = Nonword

RT = Reaction Time

TMT = Trail Making Test

TOL = Tower of London

W = Word

WPM = Words per minute

**Supplementary Table 1.** Participant background information.

| Subj | Age | Gender | Education | Years post-stroke | Lesion Volume | BDAE classification*  |
|------|-----|--------|-----------|-------------------|---------------|-----------------------|
| 1    | 55  | m      | 17        | 9                 | 11915         | Broca                 |
| 2    | 55  | f      | 12        | 12                | 9767          | Anomia                |
| 3    | 71  | m      | 11        | 8                 | 8788          | Mixed Nonfluent       |
| 4    | 61  | m      | 11        | 17                | 18392         | Broca                 |
| 5    | 72  | m      | 12        | 10                | 41379         | Global                |
| 6    | 47  | m      | 11        | 6                 | 8437          | Anomia                |
| 7    | 76  | m      | 11        | 4                 | 22732         | Mixed Nonfluent       |
| 8    | 50  | f      | 11        | 8                 | 6975          | Anomia                |
| 9    | 79  | f      | 11        | 7                 | 13577         | Anomia                |
| 10   | 63  | f      | 19        | 6                 | 9159          | Anomia                |
| 11   | 80  | m      | 13        | 5                 | 34242         | Mixed Nonfluent       |
| 12   | 71  | m      | 11        | 4                 | 3311          | Anomia                |
| 13   | 71  | m      | 13        | 6                 | 13080         | Broca                 |
| 14   | 62  | m      | 11        | 5                 | 16433         | Anomia                |
| 15   | 70  | m      | 13        | 7                 | 33239         | Global                |
| 16   | 52  | m      | 13        | 8                 | 22948         | Anomia                |
| 17   | 48  | f      | 16        | 4                 | 3897          | Conduction            |
| 18   | 84  | m      | 10        | 3                 | 12131         | Broca                 |
| 19   | 46  | f      | 13        | 5                 | 18948         | Anomia                |
| 20   | 75  | f      | 11        | 6                 | 23863         | TMA                   |
| 21   | 76  | f      | 11        | 15                | 12057         | Mixed Nonfluent       |
| 22   | 45  | f      | 16        | 3                 | 175           | Anomia                |
| 23   | 66  | m      | 11        | 4                 | 33239         | Mixed Nonfluent       |
| 24   | 69  | m      | 11        | 5                 | 31317         | Mixed Nonfluent       |
| 25   | 81  | m      | 11        | 6                 | 33678         | Mixed Nonfluent       |
| 26   | 47  | m      | 11        | 3                 | 10409         | Anomia                |
| 27   | 59  | f      | 11        | 24                | 12699         | Anomia                |
| 28   | 68  | m      | 11        | 2                 | 4879          | Conduction            |
| 29   | 53  | m      | 11        | 7                 | 37822         | Global                |
| 30   | 88  | m      | 9         | 2                 | 8528          | Anomia                |
| 31   | 75  | m      | 11        | 11                | 36877         | Broca                 |
| 32   | 67  | m      | 17        | 2                 | 6557          | Conduction            |
| 33   | 57  | m      | 16        | 2                 | 6974          | Anomia                |
| 34   | 66  | m      | 10        | 7                 | 6607          | Anomia                |
| 35   | 50  | m      | 19        | 2                 | 4538          | Anomia                |
| 36   | 51  | m      | 11        | 3                 | 14681         | Anomia                |
| 37   | 56  | f      | 11        | 2                 | 10081         | Mixed Nonfluent       |
| 38   | 69  | m      | 12        | 7                 | 37907         | Broca/Mixed Nonfluent |

\* This information is provided for completeness only. Issues with these diagnostic categories are discussed elsewhere (e.g. Dronkers and Larsen, 2001; Butler *et al.*, 2014; Kasselimis *et al.*, 2017).

**Supplementary Table 2.** Participants' scores in tests of executive function and attention.

| Subj     | TMT          |              |              | Brixton<br>err | Divided<br>omi | TOL<br>plan | Kramer<br>cat | Raven<br>B<br>cor | Design<br>Fluency<br>cor | GoNoGo     |           | Alertn<br>ess<br>RT | Distract<br>w/o distractor |          | Distract<br>w distractor |           |
|----------|--------------|--------------|--------------|----------------|----------------|-------------|---------------|-------------------|--------------------------|------------|-----------|---------------------|----------------------------|----------|--------------------------|-----------|
|          | num          | let          | swi          |                |                |             |               |                   |                          | RT         | err       |                     | RT                         | RT       | omi                      | RT        |
| 1        | 58           | <b>82</b>    | <b>161</b>   | <b>27</b>      | <b>6</b>       | <b>6</b>    | 3             | 11                | 32                       | 438        | 0         | 221                 | 566                        | 0        | <b>624</b>               | 0         |
| 2        | <b>74</b>    | 52           | 108          | 22             | 2              | 11          | <b>2</b>      | 10                | 26                       | 446        | 1         | 277                 | 510                        | 0        | 512                      | 0         |
| 3        | 82           | <b>121</b>   | <b>277</b>   | 18             | <b>14</b>      | <b>6</b>    | <b>0</b>      | 7                 | <b>14</b>                | <b>569</b> | 5         | 291                 | 424                        | 1        | 482                      | 1         |
| 4        | 47           | <b>163</b>   | <b>309</b>   | 24             | 5              | 11          | <b>2</b>      | 7                 | 19                       | 426        | <b>9</b>  | 229                 | 593                        | 0        | <b>639</b>               | 0         |
| 5        | <b>a 500</b> | <b>a 500</b> | <b>a 500</b> | <b>34</b>      | a              | <b>0</b>    | <b>0</b>      | <b>1</b>          | <b>4</b>                 | <b>737</b> | <b>11</b> | 208                 | a                          | a        | a                        | a         |
| 6        | <b>62</b>    | <b>95</b>    | <b>182</b>   | 17             | 4              | 12          | <b>2</b>      | 12                | <b>17</b>                | 485        | 1         | 221                 | 528                        | 1        | 538                      | 0         |
| 7        | <b>540</b>   | <b>a 240</b> | n/ad         | 23             | n/ad           | <b>0</b>    | <b>0</b>      | <b>3</b>          | <b>3</b>                 | a          | a         | <b>1223</b>         | n/ad                       | n/ad     | n/ad                     | n/ad      |
| 8        | <b>102</b>   | <b>142</b>   | <b>393</b>   | <b>31</b>      | <b>17</b>      | 8           | 4             | 10                | <b>15</b>                | 407        | <b>7</b>  | 211                 | 482                        | 0        | 517                      | 1         |
| 9        | <b>214</b>   | n/ad         | n/ad         | <b>38</b>      | <b>9</b>       | <b>0</b>    | <b>0</b>      | 6                 | <b>11</b>                | 525        | <b>14</b> | 234                 | n/ad                       | n/ad     | n/ad                     | n/ad      |
| 10       | 44           | <b>85</b>    | 118          | 19             | 2              | 13          | 5             | 12                | 24                       | 452        | 1         | 256                 | 506                        | 0        | 520                      | 0         |
| 11       | <b>194</b>   | <b>220</b>   | <b>372</b>   | 22             | <b>18</b>      | 6           | <b>1</b>      | 9                 | <b>9</b>                 | 557        | 3         | 324                 | 586                        | 0        | <b>647</b>               | 1         |
| 12       | 51           | 76           | <b>203</b>   | 19             | 1              | 11          | <b>1</b>      | 5                 | <b>14</b>                | 478        | 3         | 207                 | 502                        | 0        | 524                      | 0         |
| 13       | 59           | <b>104</b>   | <b>136</b>   | <b>31</b>      | n/av           | 15          | n/av          | 10                | n/av                     | n/av       | n/av      | n/av                | n/av                       | n/av     | n/av                     | n/av      |
| 14       | <b>150</b>   | <b>151</b>   | <b>220</b>   | 12             | 4              | 14          | 3             | 11                | 24                       | 527        | 0         | 194                 | 513                        | 0        | 463                      | 0         |
| 15       | <b>114</b>   | <b>129</b>   | <b>384</b>   | 28             | 2              | 10          | <b>0</b>      | 10                | <b>15</b>                | 484        | 4         | 214                 | 426                        | 0        | 442                      | 0         |
| 16       | 52           | <b>125</b>   | <b>378</b>   | 20             | 2              | 16          | <b>2</b>      | 9                 | <b>10</b>                | 462        | <b>6</b>  | 286                 | 519                        | 0        | 513                      | 0         |
| 17       | <b>53</b>    | <b>82</b>    | <b>149</b>   | 11             | <b>7</b>       | 13          | 3             | 11                | 22                       | <b>603</b> | 3         | 228                 | 475                        | 1        | 499                      | <b>4</b>  |
| 18       | <b>201</b>   | <b>352</b>   | n/av         | 21             | n/av           | n/av        | <b>0</b>      | 10                | <b>8</b>                 | 539        | 3         | 259                 | n/av                       | n/av     | n/av                     | n/av      |
| 19       | <b>64</b>    | <b>85</b>    | 122          | 13             | 2              | 16          | <b>2</b>      | 10                | 24                       | 437        | 2         | 214                 | 462                        | 0        | 437                      | 0         |
| 20       | 64           | <b>164</b>   | <b>240</b>   | 27             | 5              | 15          | 2             | 8                 | <b>15</b>                | 477        | <b>8</b>  | 256                 | 497                        | 0        | 527                      | 1         |
| 21       | <b>150</b>   | <b>400</b>   | <b>420</b>   | <b>36</b>      | <b>18</b>      | <b>0</b>    | 2             | <b>4</b>          | <b>12</b>                | <b>720</b> | 3         | 320                 | <b>634</b>                 | 0        | 650                      | <b>7</b>  |
| 22       | <b>52</b>    | <b>71</b>    | <b>167</b>   | 16             | 1              | 12          | 3             | 11                | <b>12</b>                | 534        | 2         | 285                 | 558                        | 0        | 600                      | 0         |
| 23       | <b>153</b>   | <b>292</b>   | <b>484</b>   | 19             | 6              | 7           | 3             | 10                | <b>12</b>                | <b>593</b> | 2         | 274                 | <b>609</b>                 | 1        | <b>700</b>               | 3         |
| 24       | <b>188</b>   | <b>173</b>   | <b>378</b>   | <b>36</b>      | <b>19</b>      | 9           | 3             | 7                 | <b>14</b>                | 498        | 3         | 214                 | 456                        | 1        | 484                      | 2         |
| 25       | <b>349</b>   | n/ad         | n/ad         | <b>36</b>      | n/av           | n/av        | n/av          | 6                 | <b>9</b>                 | 360        | <b>14</b> | 256                 | n/av                       | n/av     | n/av                     | n/av      |
| 26       | <b>63</b>    | <b>54</b>    | <b>155</b>   | 13             | 2              | 15          | <b>2</b>      | 11                | <b>13</b>                | 403        | 4         | 233                 | 497                        | 0        | 493                      | 0         |
| 27       | <b>111</b>   | <b>122</b>   | <b>240</b>   | 20             | 4              | 7           | <b>1</b>      | 9                 | <b>18</b>                | 380        | 1         | 241                 | 529                        | 0        | 555                      | 1         |
| 28       | 55           | <b>131</b>   | <b>188</b>   | 14             | 3              | 12          | <b>1</b>      | 7                 | 20                       | 542        | 3         | 203                 | 542                        | 0        | 568                      | 0         |
| 29       | <b>78</b>    | <b>135</b>   | <b>227</b>   | 26             | 5              | 7           | 3             | 9                 | <b>15</b>                | 437        | 1         | 225                 | 511                        | 1        | 555                      | 1         |
| 30       | 91           | 107          | <b>232</b>   | 16             | <b>14</b>      | 6           | <b>1</b>      | 5                 | <b>10</b>                | 596        | 1         | <b>399</b>          | a                          | a        | a                        | a         |
| 31       | <b>231</b>   | <b>391</b>   | <b>a 393</b> | <b>38</b>      | a              | <b>3</b>    | <b>0</b>      | <b>3</b>          | <b>7</b>                 | 532        | 5         | 272                 | 594                        | <b>3</b> | <b>832</b>               | <b>10</b> |
| 32       | <b>94</b>    | <b>207</b>   | <b>195</b>   | 21             | 6              | 14          | 3             | 9                 | 24                       | <b>550</b> | 0         | 266                 | 584                        | 0        | <b>635</b>               | 0         |
| 33       | 34           | <b>85</b>    | <b>178</b>   | 16             | 0              | 12          | 3             | 8                 | 29                       | 505        | 1         | 244                 | 494                        | 0        | 505                      | 0         |
| 34       | 54           | 67           | 155          | 16             | 6              | 14          | <b>1</b>      | 10                | 19                       | 371        | 4         | 231                 | 492                        | 0        | 507                      | 1         |
| 35       | 32           | <b>65</b>    | 127          | 14             | 0              | 14          | 3             | 11                | 26                       | 421        | 2         | 219                 | 474                        | 0        | 487                      | 0         |
| 36       | <b>138</b>   | <b>189</b>   | <b>494</b>   | 17             | 3              | <b>3</b>    | 3             | 10                | <b>8</b>                 | 373        | 0         | 247                 | 484                        | 0        | 479                      | 0         |
| 37       | <b>74</b>    | <b>131</b>   | <b>312</b>   | <b>31</b>      | <b>18</b>      | 10          | <b>1</b>      | 10                | <b>16</b>                | 374        | 1         | 254                 | 518                        | 1        | 556                      | <b>4</b>  |
| 38       | <b>167</b>   | <b>197</b>   | <b>a 360</b> | 28             | <b>14</b>      | 14          | <b>0</b>      | <b>4</b>          | <b>6</b>                 | 529        | <b>6</b>  | 224                 | 526                        | 0        | 541                      | 3         |
| n/imp    | 38/25        | 36/32        | 34/29        | 38/10          | 32/11          | 36/10       | 36/21         | 38/4              | 37/25                    | 36/6       | 36/8      | 37/2                | 31/2                       | 31/1     | 31/6                     | 31/4      |
| more imp | 84.2         | 94.1         | 100          | 47.4           | 78.6           | 58.8        | 61.1          | 21.1              | 89.5                     | 27.8       | 33.3      | 10.5                | 15.4                       | 7.7      | 30.8                     | 23.1      |
| less imp | 47.4         | 84.2         | 73.7         | 5.3            | 0              | 0           | 55.6          | 0                 | 44.4                     | 5.6        | 11.1      | 0                   | 0                          | 0        | 11.1                     | 5.6       |

Notes: n/av = not available (organisational), n/ad = not administered (based on performance in other tests), a = abandoned (stopped after instruction or during test), imp = impaired, bold = score below cut-off thus considered as impaired, more/less impaired indicates the percentage of participants with impaired scores for the two subgroups of more/less impaired patients based on a median split of nonverbal severity

**Supplementary Table 3.** Participants' scores in language tests.

| Subj           | Digit Span |          | Repetition immediate |    | Repetition delayed |    | Naming    |           | Minimal Pairs |           | CCT       | Synonym   | Word-picture matching |           | Compre-hension | Cookie Theft |             |      |
|----------------|------------|----------|----------------------|----|--------------------|----|-----------|-----------|---------------|-----------|-----------|-----------|-----------------------|-----------|----------------|--------------|-------------|------|
|                | forward    | backward | W                    | NW | W                  | NW | Cambridge | Boston    | W             | NW        | pictures  | judgment  | Spoken                | Written   | Sentence       | Token        | MLU         | WPM  |
| 1              | <b>3</b>   | <b>0</b> | <b>59</b>            | 18 | 55                 | 3  | <b>48</b> | <b>43</b> | 67            | <b>58</b> | 63        | 92        | 63                    | 63        | <b>18</b>      | 38           | <b>6.86</b> | 32.6 |
| 2              | 7          | 6        | 80                   | 27 | 79                 | 27 | 60        | 53        | 72            | <b>66</b> | <b>51</b> | <b>90</b> | 64                    | 64        | <b>27</b>      | 60           | 11.8        | 212  |
| 3              | 5          | 4        | 80                   | 26 | 77                 | 24 | 61        | <b>40</b> | 68            | 67        | <b>47</b> | <b>80</b> | 63                    | <b>60</b> | <b>25</b>      | 38           | <b>8.17</b> | 50.7 |
| 4              | 8          | 7        | <b>62</b>            | 22 | 70                 | 25 | <b>56</b> | <b>47</b> | 71            | 72        | <b>48</b> | <b>86</b> | 64                    | 64        | 28             | <b>30</b>    | <b>7.4</b>  | 18   |
| 5              | <b>2</b>   | <b>0</b> | <b>30</b>            | 0  | 0                  | 0  | <b>0</b>  | <b>0</b>  | <b>38</b>     | <b>16</b> | <b>17</b> | <b>47</b> | <b>37</b>             | <b>20</b> | <b>4</b>       | 32           | <b>8.2</b>  | 87.3 |
| 6              | <b>4</b>   | 4        | 80                   | 30 | 80                 | 27 | <b>57</b> | <b>33</b> | 70            | 71        | 58        | <b>87</b> | 64                    | 64        | 28             | 56           | 14.8        | 56   |
| 7              | <b>3</b>   | <b>2</b> | <b>40</b>            | 8  | 49                 | 5  | <b>30</b> | <b>23</b> | 71            | 71        | <b>38</b> | <b>55</b> | <b>62</b>             | <b>60</b> | <b>4</b>       | 33           | <b>3.18</b> | 7.42 |
| 8              | <b>3</b>   | <b>2</b> | <b>75</b>            | 16 | 33                 | 3  | <b>56</b> | <b>30</b> | 69            | <b>65</b> | 59        | <b>75</b> | 64                    | <b>62</b> | <b>20</b>      | 47           | 10          | 49.5 |
| 9              | 6          | <b>3</b> | <b>46</b>            | 7  | 44                 | 4  | <b>34</b> | <b>30</b> | 67            | 69        | 55        | <b>79</b> | <b>62</b>             | 63        | <b>22</b>      | <b>25</b>    | <b>4</b>    | 25.4 |
| 10             | <b>4</b>   | 4        | <b>72</b>            | 15 | 71                 | 14 | <b>57</b> | <b>26</b> | 67            | <b>54</b> | 61        | 93        | 64                    | 64        | <b>26</b>      | 315          | 19.6        | 106  |
| 11             | 5          | <b>3</b> | <b>35</b>            | 7  | 28                 | 2  | <b>25</b> | <b>6</b>  | 67            | 69        | <b>48</b> | <b>63</b> | 64                    | <b>62</b> | <b>11</b>      | <b>11</b>    | <b>1.4</b>  | 5.16 |
| 12             | 7          | <b>3</b> | <b>77</b>            | 25 | 77                 | 21 | <b>54</b> | <b>37</b> | 69            | 69        | <b>54</b> | <b>76</b> | 64                    | 64        | <b>25</b>      | 74           | 13          | 92.5 |
| 13             | <b>2</b>   | <b>2</b> | <b>41</b>            | 3  | 34                 | 1  | <b>35</b> | <b>14</b> | <b>62</b>     | <b>64</b> | 59        | <b>79</b> | 63                    | 64        | <b>18</b>      | <b>31</b>    | <b>6.83</b> | 29.5 |
| 14             | <b>3</b>   | <b>2</b> | <b>76</b>            | 13 | 76                 | 14 | <b>46</b> | <b>34</b> | 69            | 71        | 60        | <b>86</b> | 63                    | 64        | <b>25</b>      | 94           | 11.9        | 56.4 |
| 15             | <b>0</b>   | <b>0</b> | <b>1</b>             | 0  | 0                  | 0  | <b>0</b>  | <b>0</b>  | <b>56</b>     | <b>59</b> | <b>43</b> | <b>72</b> | <b>50</b>             | <b>60</b> | <b>15</b>      | <b>0</b>     | <b>0</b>    | 0    |
| 16             | <b>3</b>   | <b>2</b> | <b>69</b>            | 8  | 51                 | 4  | <b>49</b> | <b>25</b> | <b>63</b>     | <b>58</b> | <b>51</b> | <b>72</b> | <b>61</b>             | 63        | <b>24</b>      | 122          | 16.6        | 56.3 |
| 17             | <b>3</b>   | <b>0</b> | <b>31</b>            | 0  | 19                 | 0  | <b>22</b> | <b>9</b>  | <b>58</b>     | <b>57</b> | 59        | <b>86</b> | 64                    | 64        | <b>23</b>      | 38           | <b>3.15</b> | 27.5 |
| 18             | 7          | <b>2</b> | <b>52</b>            | 10 | 53                 | 5  | <b>42</b> | <b>23</b> | <b>59</b>     | <b>62</b> | <b>52</b> | <b>82</b> | <b>62</b>             | 63        | 29             | <b>18</b>    | <b>8</b>    | 17.1 |
| 19             | <b>4</b>   | <b>2</b> | <b>74</b>            | 18 | 71                 | 12 | <b>54</b> | <b>36</b> | 70            | 69        | 58        | <b>84</b> | 64                    | 64        | <b>27</b>      | 38           | <b>6.83</b> | 23.8 |
| 20             | 6          | <b>0</b> | <b>68</b>            | 17 | 73                 | 13 | <b>39</b> | <b>23</b> | 68            | <b>58</b> | 57        | <b>80</b> | 64                    | 64        | 28             | <b>25</b>    | <b>4.71</b> | 19.7 |
| 21             | <b>2</b>   | <b>0</b> | <b>0</b>             | 0  | 0                  | 0  | <b>3</b>  | <b>3</b>  | <b>61</b>     | <b>53</b> | <b>50</b> | <b>71</b> | 64                    | <b>61</b> | <b>18</b>      | 46           | <b>5.22</b> | 15.3 |
| 22             | 5          | 4        | 80                   | 26 | 80                 | 24 | 60        | 53        | 71            | 71        | <b>54</b> | <b>83</b> | 63                    | 63        | 29             | <b>22</b>    | 10.3        | 69.5 |
| 23             | <b>3</b>   | <b>0</b> | <b>71</b>            | 16 | 31                 | 6  | <b>9</b>  | <b>2</b>  | <b>62</b>     | 70        | <b>42</b> | <b>45</b> | <b>40</b>             | <b>59</b> | <b>15</b>      | 58           | <b>5.17</b> | 32.8 |
| 24             | <b>2</b>   | <b>0</b> | <b>4</b>             | 0  | 0                  | 0  | <b>1</b>  | <b>0</b>  | 69            | <b>66</b> | <b>38</b> | <b>47</b> | <b>50</b>             | <b>36</b> | <b>16</b>      | <b>1</b>     | <b>0.17</b> | 1    |
| 25             | <b>2</b>   | <b>0</b> | <b>50</b>            | 5  | 26                 | 1  | <b>16</b> | <b>10</b> | <b>31</b>     | <b>34</b> | <b>34</b> | <b>44</b> | <b>55</b>             | <b>39</b> | <b>14</b>      | <b>12</b>    | <b>4.75</b> | 7.5  |
| 26             | <b>4</b>   | <b>2</b> | <b>70</b>            | 21 | 58                 | 20 | <b>56</b> | <b>44</b> | 71            | 71        | 58        | <b>84</b> | 64                    | 64        | 30             | 48           | 14.5        | 44.3 |
| 27             | 5          | <b>0</b> | <b>76</b>            | 18 | 75                 | 17 | <b>54</b> | <b>46</b> | 66            | <b>59</b> | <b>53</b> | <b>85</b> | 63                    | 63        | <b>26</b>      | <b>23</b>    | <b>4.67</b> | 37.3 |
| 28             | <b>2</b>   | <b>2</b> | <b>11</b>            | 0  | 6                  | 1  | <b>4</b>  | <b>3</b>  | 71            | 67        | 57        | <b>67</b> | 64                    | 63        | <b>19</b>      | 55           | 9.29        | 110  |
| 29             | <b>0</b>   | <b>0</b> | <b>0</b>             | 0  | 0                  | 0  | <b>0</b>  | <b>0</b>  | <b>62</b>     | <b>61</b> | <b>40</b> | <b>50</b> | <b>38</b>             | <b>42</b> | <b>11</b>      | <b>0</b>     | <b>0</b>    | 0    |
| 30             | 5          | <b>3</b> | <b>61</b>            | 9  | 57                 | 3  | <b>35</b> | <b>33</b> | <b>55</b>     | <b>57</b> | <b>48</b> | 91        | 63                    | 63        | <b>24</b>      | 122          | 17          | 97.6 |
| 31             | <b>2</b>   | <b>2</b> | <b>52</b>            | 3  | 44                 | 4  | <b>38</b> | <b>31</b> | 67            | <b>66</b> | <b>42</b> | <b>67</b> | <b>59</b>             | 63        | <b>20</b>      | <b>19</b>    | <b>3.29</b> | 19.7 |
| 32             | <b>2</b>   | <b>2</b> | <b>17</b>            | 1  | 4                  | 1  | <b>2</b>  | <b>1</b>  | 69            | 69        | 57        | <b>86</b> | <b>62</b>             | <b>62</b> | <b>20</b>      | 203          | 19          | 94.4 |
| 33             | <b>4</b>   | <b>3</b> | <b>73</b>            | 24 | 79                 | 14 | <b>56</b> | <b>47</b> | 67            | <b>62</b> | 59        | 92        | <b>61</b>             | <b>62</b> | 30             | 116          | 16.8        | 47.7 |
| 34             | 5          | <b>3</b> | <b>57</b>            | 14 | 54                 | 9  | <b>50</b> | <b>33</b> | 66            | <b>63</b> | 56        | <b>84</b> | 64                    | 64        | <b>27</b>      | 69           | 11.6        | 55.2 |
| 35             | 5          | <b>3</b> | <b>68</b>            | 15 | 72                 | 11 | <b>50</b> | <b>46</b> | 70            | <b>63</b> | 59        | 92        | 64                    | 64        | 32             | 94           | 13.6        | 49.5 |
| 36             | 5          | <b>3</b> | 79                   | 29 | 76                 | 13 | <b>58</b> | 51        | 68            | 69        | 61        | <b>77</b> | 64                    | 64        | <b>20</b>      | 74           | <b>6.69</b> | 74   |
| 37             | <b>0</b>   | <b>0</b> | <b>0</b>             | 0  | 0                  | 0  | <b>0</b>  | <b>0</b>  | <b>51</b>     | <b>54</b> | <b>46</b> | <b>67</b> | <b>34</b>             | <b>58</b> | <b>14</b>      | <b>0</b>     | <b>0</b>    | 0    |
| 38             | <b>2</b>   | <b>2</b> | <b>40</b>            | 2  | 23                 | 2  | <b>31</b> | <b>14</b> | <b>40</b>     | <b>33</b> | <b>26</b> | <b>67</b> | <b>54</b>             | <b>59</b> | <b>14</b>      | 73           | 11.7        | 46.6 |
| Total impaired | 24         | 32       | 33                   | -  | -                  | -  | 35        | 35        | 13            | 23        | 21        | 33        | 15                    | 15        | 30             | 14           | 22          | -    |

Notes: bold = impaired; - in the last row indicates that no norms were available

|                                  | 1    | 2    | 3     | 4    | 5    | 6    | 7     | 8     | 9    | 10   | 11    | 12    | 13    | 14    | 15    | 16   | 17    | 18    | 19   | 20   | 21    | 22   | 23   | 24   | 25    | 26    | 27   | 28   | 29    | 30    | 31   | 32    | 33   | 34    |
|----------------------------------|------|------|-------|------|------|------|-------|-------|------|------|-------|-------|-------|-------|-------|------|-------|-------|------|------|-------|------|------|------|-------|-------|------|------|-------|-------|------|-------|------|-------|
| 1 Trail making numbers           | 1    | 0.80 | 0.76  | 0.42 | 0.67 | 0.59 | 0.42  | 0.57  | 0.64 | 0.56 | 0.47  | 0.35  | 0.30  | 0.44  | 0.44  | 0.59 | 0.20  | 0.28  | 0.22 | 0.33 | 0.33  | 0.31 | 0.37 | 0.33 | 0.51  | 0.59  | 0.72 | 0.58 | 0.42  | 0.72  | 0.66 | 0.21  | 0.23 | 0.06  |
| 2 Trail making letters           | 0.80 | 1    | 0.75  | 0.52 | 0.52 | 0.61 | 0.27  | 0.07  | 0.49 | 0.54 | 0.53  | 0.30  | 0.62  | 0.45  | 0.71  | 0.76 | 0.16  | 0.27  | 0.32 | 0.39 | 0.38  | 0.40 | 0.40 | 0.41 | 0.24  | 0.10  | 0.40 | 0.46 | 0.18  | 0.12  | 0.37 | 0.17  | 0.34 | 0.36  |
| 3 Trail making switching         | 0.76 | 0.75 | 1     | 0.45 | 0.59 | 0.70 | 0.10  | 0.18  | 0.30 | 0.63 | 0.20  | 0.18  | 0.20  | 0.20  | 0.30  | 0.43 | 0.19  | 0.27  | 0.26 | 0.14 | 0.38  | 0.29 | 0.39 | 0.36 | 0.26  | -0.06 | 0.50 | 0.63 | 0.38  | 0.30  | 0.59 | 0.32  | 0.52 | 0.40  |
| 4 Brixton correct                | 0.42 | 0.52 | 0.45  | 1    | 0.62 | 0.53 | 0.29  | 0.46  | 0.52 | 0.41 | 0.12  | 0.01  | 0.26  | 0.38  | 0.45  | 0.60 | 0.35  | 0.35  | 0.47 | 0.49 | 0.52  | 0.48 | 0.46 | 0.42 | 0.42  | 0.41  | 0.52 | 0.52 | 0.40  | 0.49  | 0.54 | 0.36  | 0.50 | 0.36  |
| 5 Divided accuracy               | 0.67 | 0.52 | 0.59  | 0.62 | 1    | 0.42 | 0.23  | 0.35  | 0.47 | 0.42 | 0.24  | 0.20  | 0.05  | 0.27  | 0.18  | 0.48 | 0.23  | 0.23  | 0.40 | 0.41 | 0.49  | 0.43 | 0.39 | 0.42 | 0.35  | 0.27  | 0.53 | 0.45 | 0.21  | 0.48  | 0.57 | 0.24  | 0.37 | 0.28  |
| 6 TOL planning                   | 0.59 | 0.61 | 0.70  | 0.53 | 0.42 | 1    | 0.37  | 0.43  | 0.59 | 0.52 | 0.42  | 0.38  | 0.35  | 0.38  | 0.50  | 0.52 | 0.08  | 0.18  | 0.23 | 0.17 | 0.25  | 0.26 | 0.28 | 0.14 | 0.18  | 0.17  | 0.42 | 0.44 | 0.24  | 0.36  | 0.57 | 0.31  | 0.45 | 0.17  |
| 7 Kramer categories              | 0.42 | 0.27 | 0.10  | 0.29 | 0.23 | 0.37 | 1     | 0.51  | 0.60 | 0.57 | 0.25  | 0.25  | -0.03 | 0.23  | 0.14  | 0.30 | -0.04 | 0.04  | 0.22 | 0.26 | 0.16  | 0.14 | 0.19 | 0.15 | 0.39  | 0.23  | 0.53 | 0.26 | 0.13  | 0.11  | 0.29 | 0.48  | 0.32 | 0.17  |
| 8 GoNoGo accuracy                | 0.57 | 0.07 | 0.18  | 0.46 | 0.35 | 0.43 | 0.51  | 1     | 0.62 | 0.53 | 0.22  | 0.23  | -0.15 | 0.22  | 0.07  | 0.23 | -0.03 | 0.06  | 0.03 | 0.22 | 0.17  | 0.20 | 0.17 | 0.16 | 0.59  | 0.52  | 0.54 | 0.35 | 0.21  | 0.47  | 0.30 | 0.21  | 0.11 | 0.10  |
| 9 Raven B                        | 0.64 | 0.49 | 0.30  | 0.52 | 0.47 | 0.59 | 0.60  | 0.62  | 1    | 0.59 | 0.50  | 0.35  | 0.29  | 0.29  | 0.43  | 0.58 | 0.10  | 0.13  | 0.29 | 0.37 | 0.30  | 0.29 | 0.34 | 0.25 | 0.40  | 0.45  | 0.70 | 0.49 | 0.20  | 0.45  | 0.50 | 0.20  | 0.18 | 0.07  |
| 10 Design Fluency total          | 0.56 | 0.54 | 0.63  | 0.41 | 0.42 | 0.52 | 0.57  | 0.53  | 0.59 | 1    | 0.29  | 0.36  | 0.15  | 0.31  | 0.27  | 0.42 | 0.10  | 0.17  | 0.18 | 0.28 | 0.28  | 0.27 | 0.26 | 0.30 | 0.42  | 0.27  | 0.65 | 0.63 | 0.28  | 0.35  | 0.50 | 0.35  | 0.32 | 0.28  |
| 11 GoNoGo RT                     | 0.47 | 0.53 | 0.20  | 0.12 | 0.24 | 0.42 | 0.25  | 0.22  | 0.50 | 0.29 | 1     | 0.32  | 0.40  | 0.20  | 0.37  | 0.45 | 0.13  | 0.16  | 0.30 | 0.36 | 0.34  | 0.27 | 0.41 | 0.41 | 0.20  | 0.26  | 0.35 | 0.20 | 0.13  | 0.24  | 0.31 | -0.02 | 0.00 | -0.07 |
| 12 Alertness RT                  | 0.35 | 0.30 | 0.18  | 0.01 | 0.20 | 0.38 | 0.25  | 0.23  | 0.35 | 0.36 | 0.32  | 1     | 0.46  | 0.12  | 0.47  | 0.35 | 0.02  | -0.04 | 0.06 | 0.07 | -0.03 | 0.08 | 0.04 | 0.02 | -0.11 | -0.14 | 0.21 | 0.21 | -0.09 | -0.05 | 0.39 | 0.03  | 0.13 | 0.13  |
| 13 Distract RT w/o distractor    | 0.30 | 0.62 | 0.20  | 0.26 | 0.05 | 0.35 | -0.03 | -0.15 | 0.29 | 0.15 | 0.40  | 0.46  | 1     | 0.11  | 0.88  | 0.40 | 0.00  | -0.02 | 0.13 | 0.15 | 0.17  | 0.13 | 0.22 | 0.16 | 0.00  | -0.04 | 0.11 | 0.17 | 0.02  | -0.16 | 0.24 | -0.04 | 0.00 | 0.02  |
| 14 Distract corr w/o distractor  | 0.44 | 0.45 | 0.20  | 0.38 | 0.27 | 0.38 | 0.23  | 0.22  | 0.29 | 0.31 | 0.20  | 0.12  | 0.11  | 1     | 0.50  | 0.71 | 0.34  | 0.19  | 0.18 | 0.25 | 0.22  | 0.17 | 0.24 | 0.23 | 0.12  | -0.07 | 0.39 | 0.42 | 0.40  | 0.32  | 0.26 | 0.29  | 0.40 | 0.31  |
| 15 Distract RT w distractor      | 0.44 | 0.71 | 0.30  | 0.45 | 0.18 | 0.50 | 0.14  | 0.07  | 0.43 | 0.27 | 0.37  | 0.47  | 0.86  | 0.50  | 1     | 0.62 | 0.09  | 0.03  | 0.15 | 0.21 | 0.22  | 0.20 | 0.24 | 0.18 | 0.01  | -0.06 | 0.27 | 0.30 | 0.13  | -0.05 | 0.32 | 0.09  | 0.18 | 0.15  |
| 16 Distract corr w distractor    | 0.59 | 0.76 | 0.43  | 0.60 | 0.48 | 0.52 | 0.30  | 0.23  | 0.58 | 0.42 | 0.45  | 0.35  | 0.40  | 0.71  | 0.62  | 1    | 0.38  | 0.36  | 0.36 | 0.49 | 0.41  | 0.42 | 0.37 | 0.35 | 0.39  | 0.31  | 0.44 | 0.39 | 0.26  | 0.13  | 0.36 | 0.27  | 0.44 | 0.36  |
| 17 Digit Span forward            | 0.20 | 0.16 | 0.19  | 0.35 | 0.23 | 0.08 | -0.04 | -0.03 | 0.10 | 0.10 | 0.13  | 0.02  | 0.00  | 0.34  | 0.09  | 0.38 | 1     | 0.67  | 0.68 | 0.69 | 0.76  | 0.68 | 0.71 | 0.70 | 0.42  | 0.36  | 0.36 | 0.52 | 0.60  | 0.42  | 0.63 | 0.10  | 0.31 | 0.34  |
| 18 Digit Span backward           | 0.28 | 0.27 | 0.27  | 0.35 | 0.23 | 0.18 | 0.04  | 0.06  | 0.13 | 0.17 | 0.16  | -0.04 | -0.02 | 0.19  | 0.03  | 0.36 | 0.67  | 1     | 0.53 | 0.60 | 0.62  | 0.69 | 0.66 | 0.64 | 0.46  | 0.42  | 0.29 | 0.52 | 0.52  | 0.44  | 0.50 | 0.32  | 0.50 | 0.51  |
| 19 Repetition immediate W        | 0.22 | 0.32 | 0.26  | 0.47 | 0.40 | 0.23 | 0.22  | 0.03  | 0.29 | 0.18 | 0.30  | 0.06  | 0.13  | 0.18  | 0.15  | 0.36 | 0.68  | 0.53  | 1    | 0.86 | 0.92  | 0.74 | 0.90 | 0.83 | 0.34  | 0.28  | 0.41 | 0.50 | 0.52  | 0.42  | 0.63 | 0.27  | 0.52 | 0.38  |
| 20 Repetition immediate NW       | 0.33 | 0.39 | 0.14  | 0.49 | 0.41 | 0.17 | 0.26  | 0.22  | 0.37 | 0.28 | 0.36  | 0.07  | 0.15  | 0.25  | 0.21  | 0.49 | 0.69  | 0.60  | 0.86 | 1    | 0.88  | 0.89 | 0.85 | 0.85 | 0.50  | 0.44  | 0.47 | 0.52 | 0.46  | 0.42  | 0.63 | 0.14  | 0.40 | 0.37  |
| 21 Repetition delayed W          | 0.33 | 0.38 | 0.38  | 0.52 | 0.49 | 0.25 | 0.16  | 0.17  | 0.30 | 0.28 | 0.34  | -0.03 | 0.17  | 0.22  | 0.22  | 0.41 | 0.76  | 0.62  | 0.92 | 0.88 | 1     | 0.83 | 0.93 | 0.91 | 0.49  | 0.41  | 0.51 | 0.64 | 0.61  | 0.53  | 0.72 | 0.25  | 0.46 | 0.33  |
| 22 Repetition delayed NW         | 0.31 | 0.40 | 0.29  | 0.48 | 0.43 | 0.26 | 0.14  | 0.20  | 0.29 | 0.27 | 0.27  | 0.08  | 0.13  | 0.17  | 0.20  | 0.42 | 0.68  | 0.69  | 0.74 | 0.89 | 0.83  | 1    | 0.77 | 0.78 | 0.50  | 0.42  | 0.35 | 0.51 | 0.43  | 0.38  | 0.67 | 0.13  | 0.39 | 0.41  |
| 23 Naming Cambridge              | 0.37 | 0.40 | 0.39  | 0.46 | 0.39 | 0.28 | 0.19  | 0.17  | 0.34 | 0.26 | 0.41  | 0.04  | 0.22  | 0.24  | 0.24  | 0.37 | 0.71  | 0.66  | 0.90 | 0.85 | 0.93  | 0.77 | 1    | 0.93 | 0.48  | 0.37  | 0.54 | 0.68 | 0.67  | 0.56  | 0.72 | 0.24  | 0.49 | 0.32  |
| 24 Naming Boston                 | 0.33 | 0.41 | 0.36  | 0.42 | 0.42 | 0.14 | 0.15  | 0.16  | 0.25 | 0.30 | 0.41  | 0.02  | 0.16  | 0.23  | 0.18  | 0.35 | 0.70  | 0.64  | 0.83 | 0.85 | 0.91  | 0.78 | 0.93 | 1    | 0.49  | 0.39  | 0.49 | 0.68 | 0.61  | 0.50  | 0.70 | 0.14  | 0.42 | 0.36  |
| 25 Minimal Pairs W               | 0.51 | 0.24 | 0.26  | 0.42 | 0.35 | 0.18 | 0.39  | 0.59  | 0.40 | 0.42 | 0.20  | -0.11 | 0.00  | 0.12  | 0.01  | 0.39 | 0.42  | 0.46  | 0.34 | 0.50 | 0.49  | 0.50 | 0.48 | 0.49 | 1     | 0.88  | 0.69 | 0.48 | 0.55  | 0.59  | 0.50 | 0.16  | 0.18 | 0.19  |
| 26 Minimal Pairs NW              | 0.59 | 0.10 | -0.06 | 0.41 | 0.27 | 0.17 | 0.23  | 0.52  | 0.45 | 0.27 | 0.26  | -0.14 | -0.04 | -0.07 | -0.06 | 0.31 | 0.36  | 0.42  | 0.28 | 0.44 | 0.41  | 0.42 | 0.37 | 0.39 | 0.88  | 1     | 0.64 | 0.36 | 0.46  | 0.65  | 0.43 | 0.00  | 0.04 | 0.01  |
| 27 Camel & Cactus                | 0.72 | 0.40 | 0.50  | 0.52 | 0.53 | 0.42 | 0.53  | 0.54  | 0.70 | 0.65 | 0.35  | 0.21  | 0.11  | 0.39  | 0.27  | 0.44 | 0.36  | 0.29  | 0.41 | 0.47 | 0.51  | 0.35 | 0.54 | 0.49 | 0.69  | 0.64  | 1    | 0.77 | 0.67  | 0.76  | 0.69 | 0.33  | 0.36 | 0.19  |
| 28 Synonym judgment              | 0.58 | 0.46 | 0.63  | 0.52 | 0.45 | 0.44 | 0.26  | 0.35  | 0.49 | 0.63 | 0.20  | 0.21  | 0.17  | 0.42  | 0.30  | 0.39 | 0.52  | 0.52  | 0.50 | 0.52 | 0.64  | 0.51 | 0.68 | 0.68 | 0.48  | 0.36  | 0.77 | 1    | 0.69  | 0.73  | 0.80 | 0.43  | 0.57 | 0.38  |
| 29 Word-picture matching spoken  | 0.42 | 0.18 | 0.38  | 0.40 | 0.21 | 0.24 | 0.13  | 0.21  | 0.20 | 0.28 | 0.13  | -0.09 | 0.02  | 0.40  | 0.13  | 0.26 | 0.60  | 0.52  | 0.52 | 0.46 | 0.61  | 0.43 | 0.67 | 0.61 | 0.55  | 0.46  | 0.67 | 0.69 | 1     | 0.69  | 0.62 | 0.29  | 0.44 | 0.28  |
| 30 Word-picture matching written | 0.72 | 0.12 | 0.30  | 0.49 | 0.48 | 0.36 | 0.11  | 0.47  | 0.45 | 0.35 | 0.24  | -0.05 | -0.16 | 0.32  | -0.05 | 0.13 | 0.42  | 0.44  | 0.42 | 0.42 | 0.53  | 0.38 | 0.56 | 0.50 | 0.59  | 0.65  | 0.76 | 0.73 | 0.69  | 1     | 0.61 | 0.26  | 0.31 | 0.15  |
| 31 Sentence comprehension        | 0.66 | 0.37 | 0.59  | 0.54 | 0.57 | 0.57 | 0.29  | 0.30  | 0.50 | 0.50 | 0.31  | 0.39  | 0.24  | 0.26  | 0.32  | 0.36 | 0.63  | 0.50  | 0.63 | 0.63 | 0.72  | 0.67 | 0.72 | 0.70 | 0.50  | 0.43  | 0.69 | 0.80 | 0.62  | 0.61  | 1    | 0.29  | 0.54 | 0.29  |
| 32 Cookie Theft Token            | 0.21 | 0.17 | 0.32  | 0.36 | 0.24 | 0.31 | 0.48  | 0.21  | 0.20 | 0.35 | -0.02 | 0.03  | -0.04 | 0.29  | 0.09  | 0.27 | 0.10  | 0.32  | 0.27 | 0.14 | 0.25  | 0.13 | 0.24 | 0.14 | 0.16  | 0.00  | 0.33 | 0.43 | 0.29  | 0.26  | 0.29 | 1     | 0.80 | 0.52  |
| 33 Cookie Theft MLU              | 0.23 | 0.34 | 0.52  | 0.50 | 0.37 | 0.45 | 0.32  | 0.11  | 0.18 | 0.32 | 0.00  | 0.13  | 0.00  | 0.40  | 0.18  | 0.44 | 0.31  | 0.50  | 0.52 | 0.40 | 0.46  | 0.39 | 0.49 | 0.42 | 0.18  | 0.04  | 0.36 | 0.57 | 0.44  | 0.31  | 0.54 | 0.80  | 1    | 0.65  |
| 34 Cookie Theft WPM              | 0.06 | 0.36 | 0.40  | 0.36 | 0.28 | 0.17 | 0.17  | 0.10  | 0.07 | 0.28 | -0.07 | 0.13  | 0.02  | 0.31  | 0.15  | 0.36 | 0.34  | 0.51  | 0.38 | 0.37 | 0.33  | 0.41 | 0.32 | 0.36 | 0.19  | 0.01  | 0.19 | 0.38 | 0.28  | 0.15  | 0.29 | 0.    |      |       |

Shift- Update

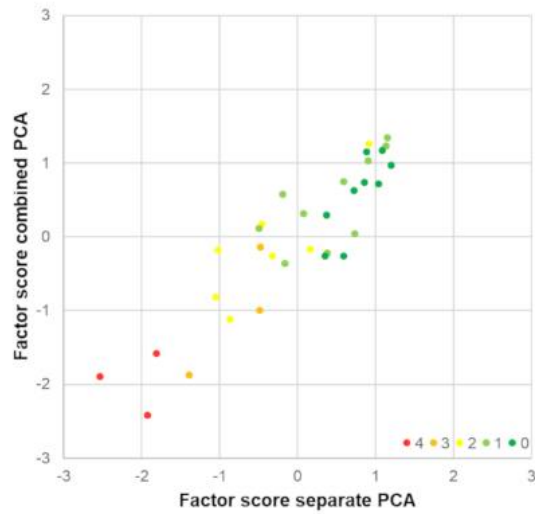

Inhibit - Generate

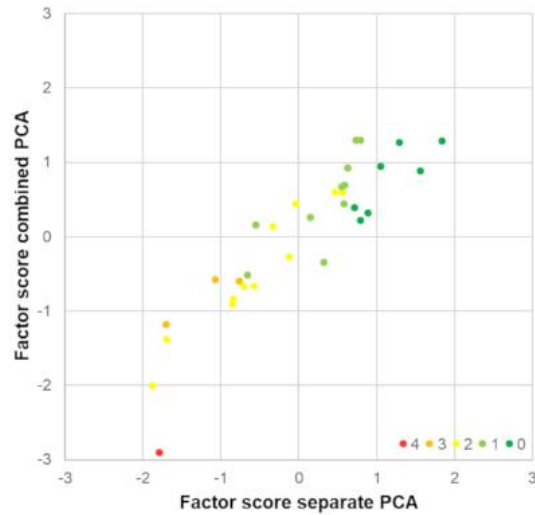

Speed

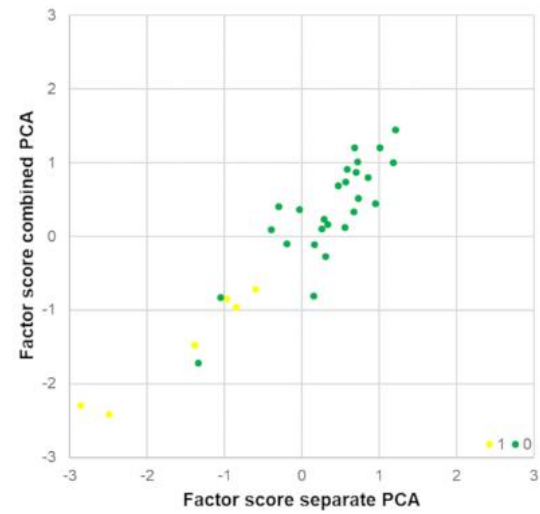

Phonology

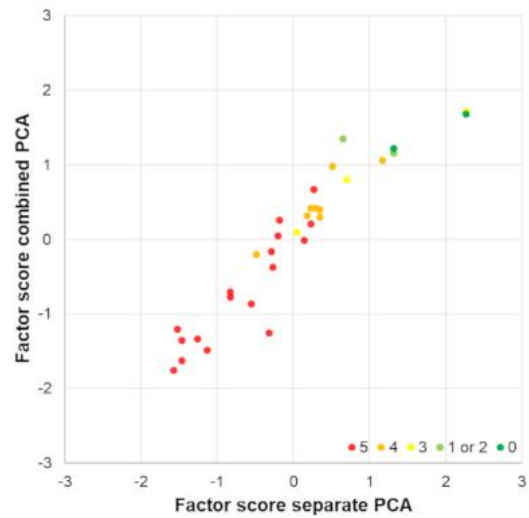

Semantics

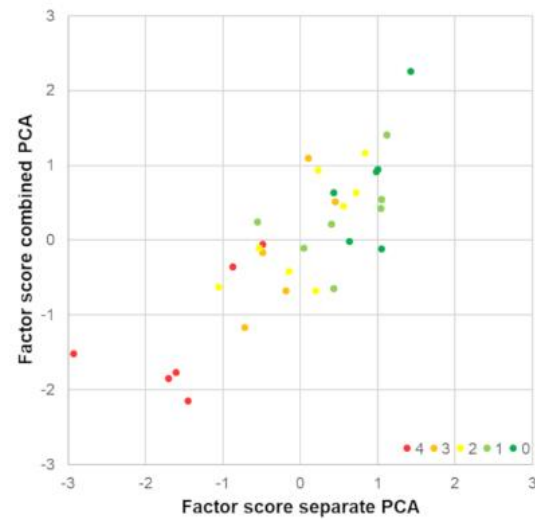

Speech Quanta

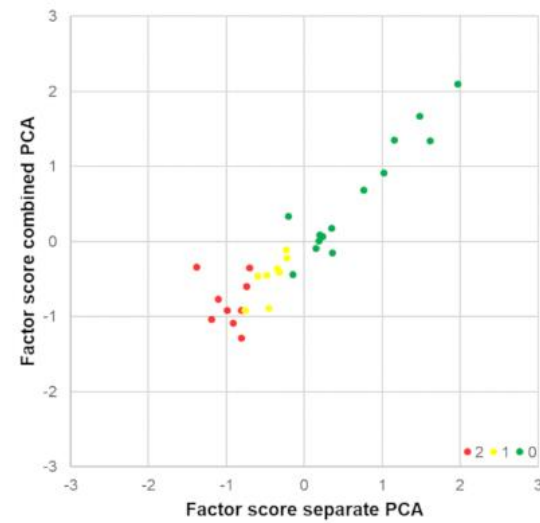



**Supplementary Fig. 2.** Relationship between and individual's separate and combined component scores and impaired test performance. The colour (legend in the bottom right corner of each graph) indicates the level of impairment (i.e. the individual's number of impaired test scores) in the tests contributing most to each component of the separate analyses (Shift-Update: Trails numbers, Brixton, Divided omissions, Tower of London; Inhibit-Generate: Kramer, Raven B, GoNoGo errors, Design Fluency; Speed: Alertness and GoNoGo median reaction time; Phonology: Boston and Cambridge Naming, Digit Spans, Repetition; Semantics: Synonym judgment, Camel & Cactus, spoken and written Word-Picture matching; Speech Quanta: Token and mean length of utterance of Cookie Theft; see also Fig. 4 in main text). A high correlation between the two component scores (see also Table 1 in main text) and a relatively good fit between component score and impairment can be observed (note that raw scores (sometimes combined) were included in the PCA while impairment in a test was based on norm data, which was corrected for age and education for some tests). Impairment in the Minimal Pairs and in spoken sentence comprehension is not considered as both tests loaded nearly identically on both language components in the separate analyses.

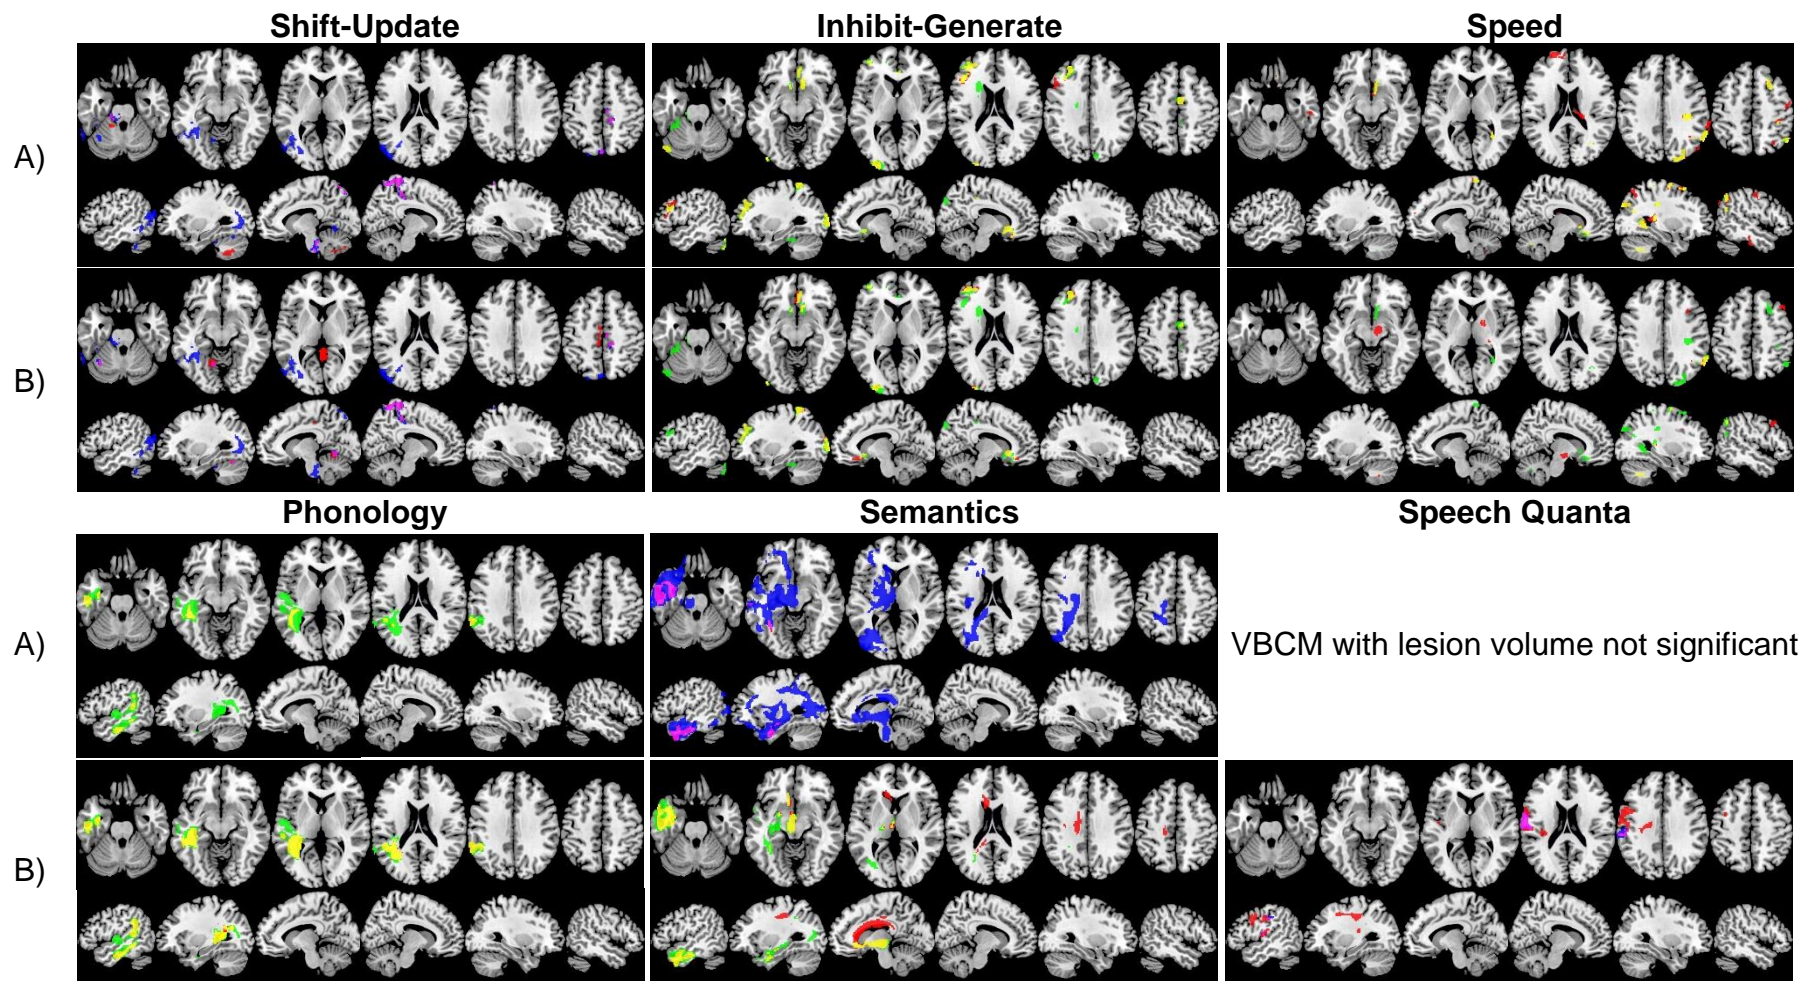

**Supplementary Fig. 3.** Comparison of VBCM clusters with and without covariates. (A) shows the overlap of the VBCM clusters without covariates with the VBCM clusters including lesion as a covariate. (B) shows the comparison with the VBCM clusters including age, education, time post stroke as covariates; The significant VBCM clusters without covariates, presented in the main text, are shown in blue (voxel-level threshold 0.01) or green (voxel-level threshold 0.001), the clusters they are compared to (same voxel-level threshold) are shown in red, their overlap in magenta or yellow, respectively. The cluster-level threshold was set at  $p < 0.05$ , FWEc. MNI coordinates from left to right are  $z = -25, -10, 5, 20, 35, 50$  for the axial slices and  $x = -50, -30, -10, 10, 30, 50$  for the sagittal slices. Figures are in neurological convention (left is left) and thresholded at the respective minimum t-value.

Lesion volume

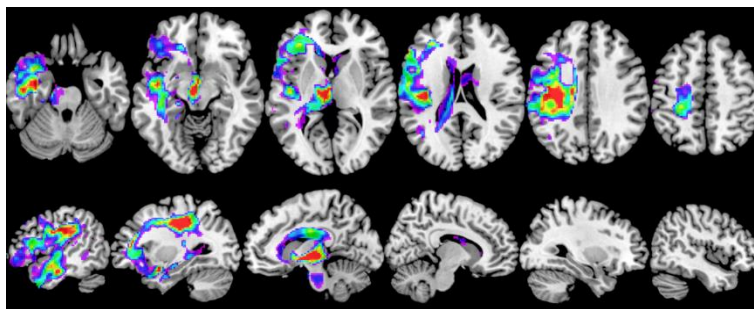

Age

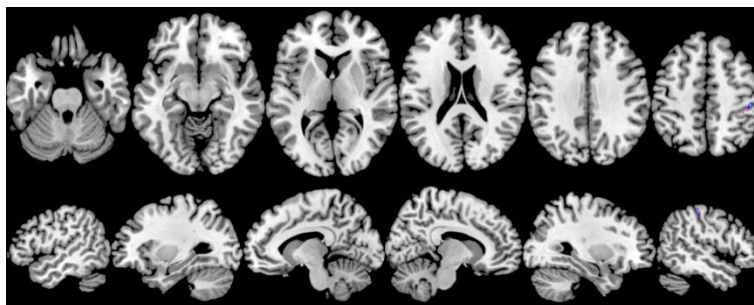

Time post stroke

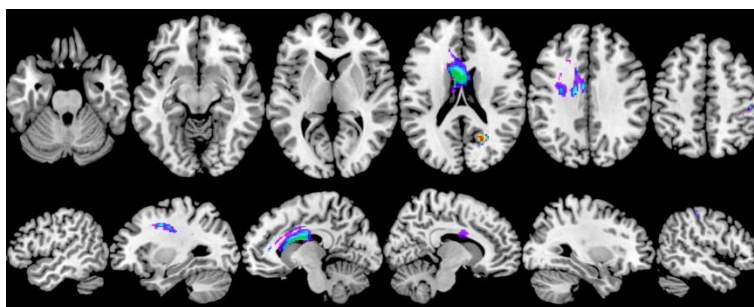

3.5  6

**Supplementary Fig. 4.** Cluster associated with lesion volume, age, and time post stroke when only the patient characteristics were included in the VBCM analysis. There was no cluster associated with education at the applied threshold (voxel-level  $p < 0.001$  and FWEc at cluster-level  $p \leq 0.05$ ). The same slices as in Supplementary Fig. 3 are shown. Figures are in neurological convention (left is left).

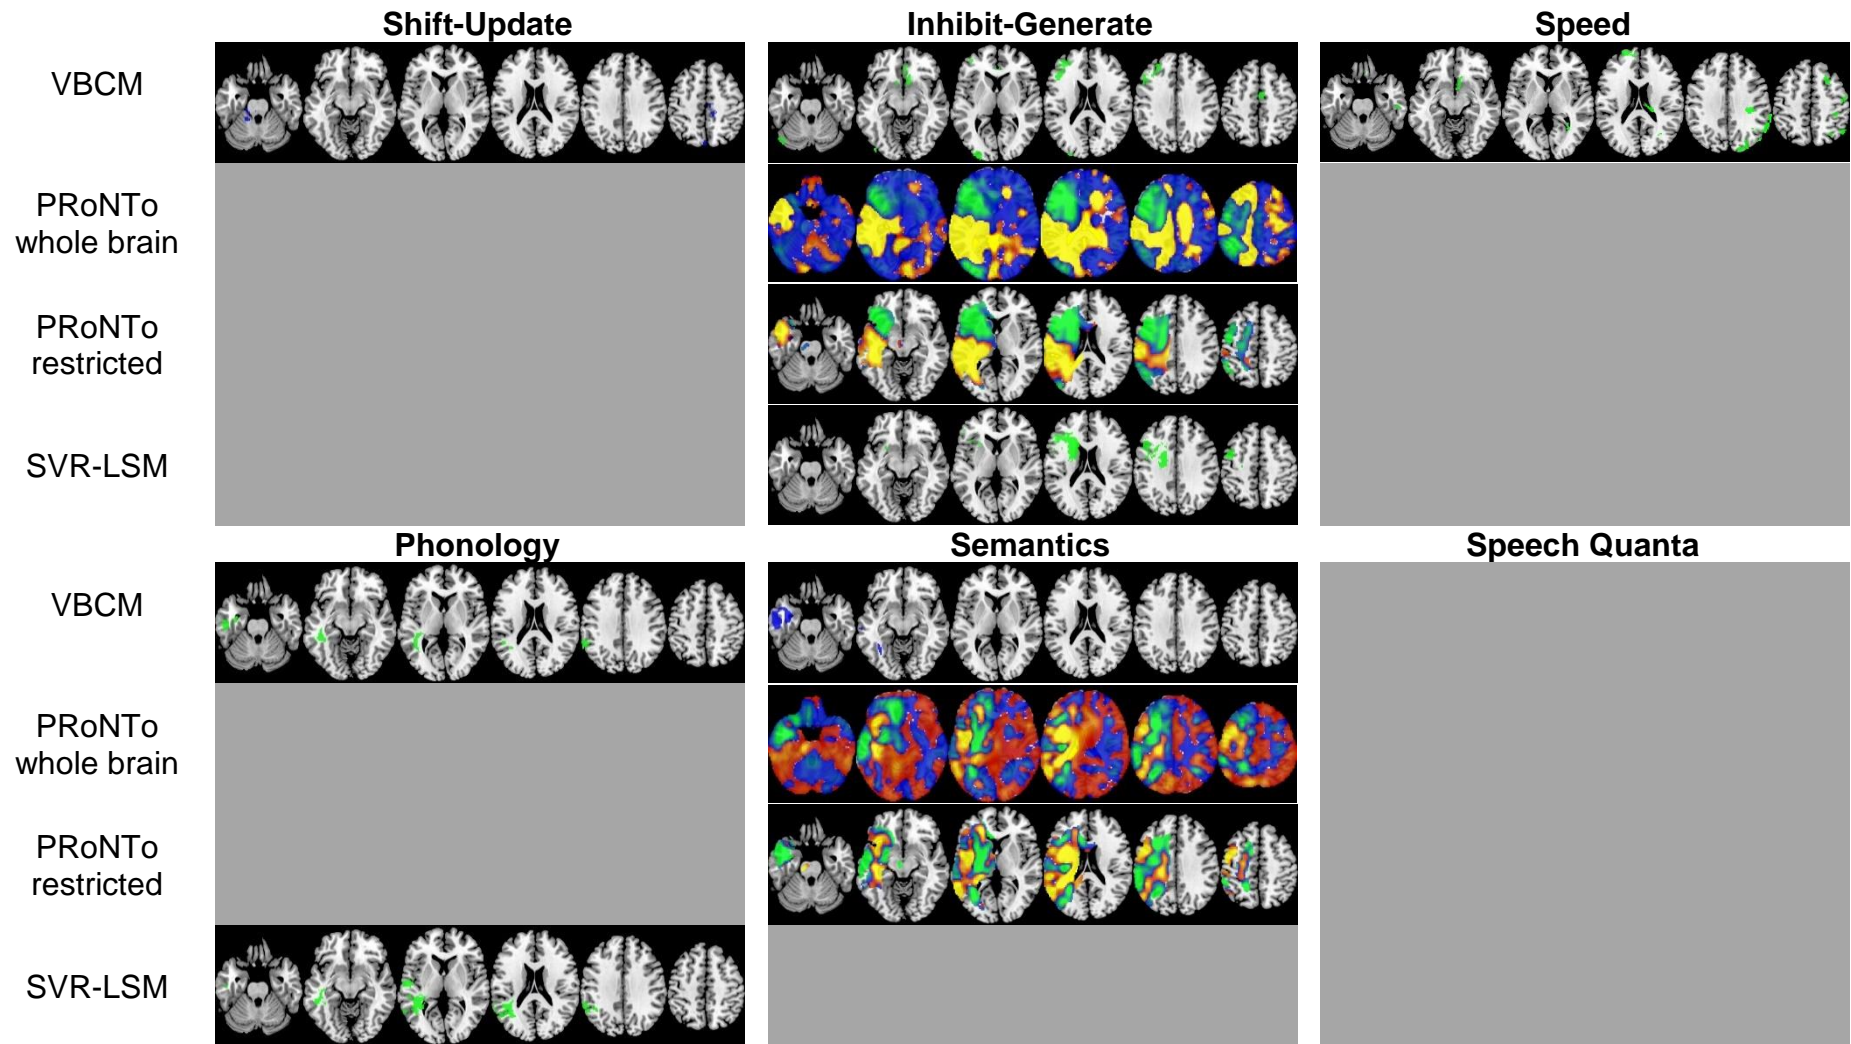

**Supplementary Fig. 5.** Comparison of the univariate and multivariate approaches when lesion volume is included as covariate. The VBCM clusters are shown in blue (voxel-level threshold 0.01) and green (voxel-level threshold 0.001), a family-wise error correction of  $p \leq 0.05$  was applied to all clusters, and images are thresholded at the respective minimum t-value. The PRoNT0 results depict the weights for the winning model if significant (see text), either including the whole brain space or restricting it to lesion territory ( $N > 3$ ). They are thresholded from -0.005 to -0.0001 (green-blue) and 0.0001 to 0.005 (red-yellow). The negative weights are considered as more meaningful in this approach. The SVR-LSM images show voxels with significant beta weights after permutation testing ( $N=10,000$ , voxel-wise  $p < 0.005$  and cluster-wise  $p < 0.05$ ). MNI coordinates of slices, from left to right, are  $z = -25, -10, 5, 20, 35, 50$  and they are in neurological convention (left is left). A grey surface indicates that no significant results were found for the respective component and methodological approach.



### **Effects of including patient characteristics as covariates**

When lesion volume was included in the VBCM analysis, the extent of the clusters was generally reduced, as shown in Supplementary Fig. 3. Also, the speech quanta cluster was not significant anymore and the semantics cluster only appeared at a less strict threshold. Supplementary Fig. 4 shows that brain regions on the edge of the overall lesion extent were associated with lesion volume in the VBCM that included the patient characteristics only. Peak regions of this lesion volume cluster overlap with the semantics and speech quanta components, which explains why they emerged only at a less strict threshold or not anymore when lesion volume was taken into account. Similarly, when lesion volume was included in the multivariate approaches, as shown in Supplementary Fig. 5, only the models for inhibit-generate and for phonology remained significant in the SVR-LSM. Interestingly, the SVR-LSM result for inhibit-generate is more similar to the (uncorrected) VBCM cluster if lesion volume is added as a covariate. The PRoNT<sub>o</sub> approaches yielded significant results for inhibit-generate (KRR model whole brain: cross-validation  $r = 0.338$ ,  $MSE = 0.857$ ,  $p = 0.028$ ; KRR model restricted lesion territory:  $r = 0.384$ ,  $MSE = 0.818$ ,  $p = 0.028$ ) and semantics (KRR model whole brain:  $r = 0.603$ ,  $MSE = 0.402$ ,  $p < 0.002$ ; KRR model restricted lesion territory:  $r = 0.597$ ,  $MSE = 0.419$ ,  $p < 0.001$ ) only. Including lesion volume as a covariate has thus not the same effect in the different brain-behaviour mapping approaches, but generally leads to a reduction of significant models. It remains possible that including lesion volume in brain-behaviour mapping might lead to Type II error; hence it is unclear which strategy might be optimal.

The other patient characteristics (age, education, time post stroke) had a weaker effect on the brain-behaviour mapping. All nonverbal and verbal clusters still emerged at the same thresholds as when analysed by means of the VBCM without the covariates. However, their extent was somewhat smaller but could also include additional areas.

## References

Butler RA, Lambon Ralph MA, Woollams AM. Capturing multidimensionality in stroke aphasia: mapping principal behavioural components to neural structures. *Brain* 2014; 137: 3248-66.

Dronkers NF, Larsen JL. Neuroanatomy of the classical syndromes of aphasia. In: Boller F, Grafman J, editors. *Handbook of Neuropsychology*. 2nd ed. New York: Elsevier Science; 2001. p. 19-30.

Kasselimis DS, Simos PG, Peppas C, Evdokimidis I, Potagas C. The unbridged gap between clinical diagnosis and contemporary research on aphasia: A short discussion on the validity and clinical utility of taxonomic categories. *Brain and Language* 2017; 164: 63-7.
